# Supplementary material for: SynteBase/SynteView: a tool to visualize gene order conservation in prokaryotic genomes
Source: PubMed Central journal article supplement (PMC2667195; doi:10.1186/1471-2105-9-536), 2008-12-16
Supplement: 1471-2105-9-536-S2.pdf [file 1471-2105-9-536-S2.pdf]

**SQL query allowing the computation of the POGs using SynteBase.**

```
select b1.pid_1 as pid1_sp1,  
b1.pid_2 as pid1_sp2,  
b2.pid_1 as pid2_sp1,  
b2.pid_2 as pid2_sp2  
from ortho as b1,  
ortho as b2,  
protein as p1,  
protein as p2,  
protein as p3,  
protein as p4  
where p1.pid = b1.pid_1  
AND p2.pid = b1.pid_2  
AND p3.pid = b2.pid_1  
AND p4.pid = b2.pid_2  
AND p3.species_abrv=p1.species_abrv  
and p4.species_abrv =p2.species_abrv  
and p1.pid_new = (p3.pid_new+1)  
and (p2.pid_new = (p4.pid_new+1) OR p2.pid_new = (p4.pid_new-1))  
and p1.strand = p3.strand and p2.strand = p4.strand;
```
